# Supplementary material for: Acoustic actuation of bioinspired microswimmers
Source: Royal Society of Chemistry journal article supplement (doi:10.1039/c6lc01272h), 2016-12-19
Supplement: c6lc01272h1.pdf [file c6lc01272h1.pdf]

Supplementary Material (ESI) for Lab on a Chip  
This journal is © The Royal Society of Chemistry 2016

## Acoustic actuation of bioinspired microswimmers

**Murat Kaynak,<sup>a</sup> Adem Ozcelik,<sup>b</sup> Amir Nourhani,<sup>c</sup> Paul E. Lammert,<sup>c</sup> Vincent H. Crespi<sup>\*c</sup> and Tony Jun Huang<sup>\*a,b</sup>**

*a. Department of Engineering Science and Mechanics, The Pennsylvania State University, University Park, PA 16802, USA. Fax: 814-865-9974; Tel: 814-863-4209*

*b. Department of Mechanical Engineering and Material Science, Duke University, Durham, NC 27708 USA. Email: tony.huang@duke.edu*

*c. Department of Physics, The Pennsylvania State University, University Park, Pennsylvania 16802, USA Tel: 814 863-0163; Email: crespi@phys.psu.edu*

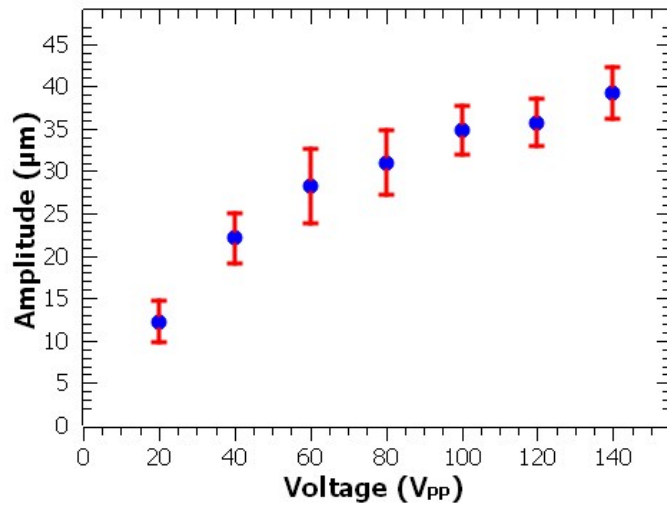

**Figure S1:** Oscillation amplitude analysis of rotational microswimmers. Error bars represent the standard deviation of five or more videos at each VPP.

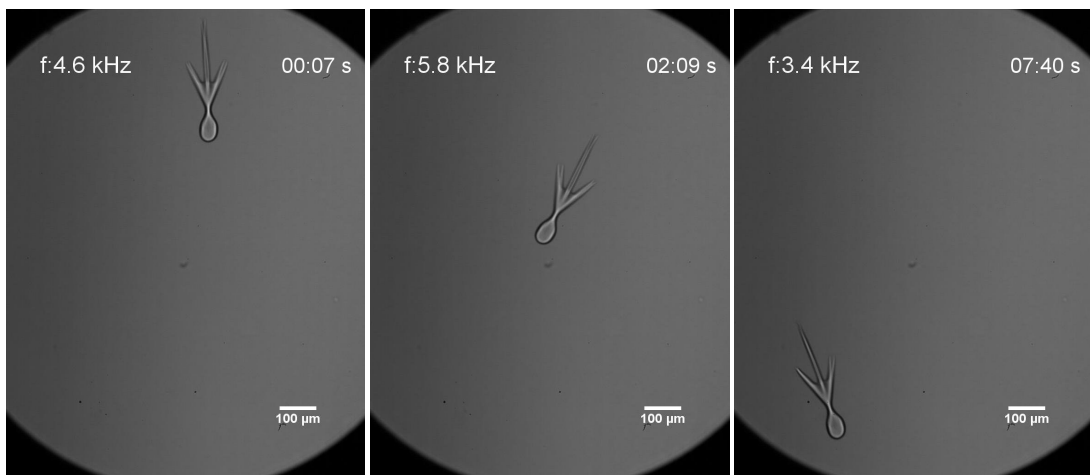

**Figure S2:** A two-branch-one-tail microswimmer steering its direction upon the frequency change.

## Video Captions

### Video 1: Flagellum oscillation

The tail of the microswimmer oscillates at much higher amplitude than the head, due to its greater flexibility.

**Video 2: Microswimmer without flagellum**

A microswimmer without a tail is not able to swim due to lack of flagellum which generates acoustic streaming under acoustic field.

**Video 3: Directional motility**

The flagellum oscillates and induces directional motion along the head-tail axis.

**Video 4: Rotation at different directions**

Rotational microswimmers are pre-programmed for clockwise or counter-clockwise rotation according to which side of the structure hosts the flagellum.

**Video 5: Swimming towards each other**

The microswimmers are motionless in the absence of acoustic excitation in the beginning of the movie. After application of an external acoustic field, each swims directly towards the other. Then, the swimmers pass each other and continue along their directions of motion.

**Video 6: Microswimmer changes directions**

The two-branch-one-tail microswimmer starts swimming directionally at 4.6 kHz. It then changes the direction to the left and right, respectively, with varying frequencies at 5.8 kHz and 3.4 kHz.

**Video 7: Rotation of a microswimmer**

The flagellum is at rest in the absence of acoustic excitation. It then begins to oscillate and rotate the body of the swimmer when the acoustic transducer is activated.
